# Supplementary material for: Cirsium japonicum mitigates allergic nasal inflammation by regulating NRF2-mediated mucin production: Systematic transcriptome and molecular docking analyses
Source: PubMed Central journal article supplement — J Pharm Anal. 2024 May 23;14(10):101000. doi: 10.1016/j.jpha.2024.101000 (PMC11472077; doi:10.1016/j.jpha.2024.101000), 2024-05-23
Supplement: mmc2.pdf [file mmc2.pdf]

1  
2  
3  
4  
5  
6  
7  
8  
9  
10  
11  
12  
13  
14  
15  
16  
17  
18  
19

***Cirsium japonicum* mitigates allergic nasal inflammation by regulating NRF2-mediated mucin production: Systematic transcriptome and molecular docking analyses**

Bo-Jeong Pyun<sup>a,1</sup>, Su-Jin Baek<sup>b,1</sup>, Kyuhyung Jo<sup>a</sup>, Ik Soo Lee<sup>a</sup>, Musun Park<sup>b</sup>, Hye Jin Kim<sup>a</sup>,  
Joo Young Lee<sup>a</sup>, Susanna Choi<sup>a</sup>, Yun Hee Kim<sup>a,\*\*</sup> and Taesoo Kim<sup>a,\*</sup>

<sup>a</sup> KM Convergence Research Division, Korea Institute of Oriental Medicine, 1672 Yuseong-daero  
Yuseong-gu, Daejeon 34054, Republic of Korea

<sup>b</sup> KM Data Division, Korea Institute of Oriental Medicine, 1672 Yuseong-daero, Yuseong-gu, Daejeon  
34054, Republic of Korea

<sup>1</sup> These authors contributed equally to this work.

\* Corresponding author.

\*\* Corresponding author.

*E-mail addresses:* [xotn91@kiom.re.kr](mailto:xotn91@kiom.re.kr) (T.K.), [ddyunee@kiom.re.kr](mailto:ddyunee@kiom.re.kr) (Y.K.).

## 20 **1. Supplementary Figures (S1–S11)**

21 Fig. S1. Effects of CSJ on allergy nasal symptoms and NALF in the OVA-induced AR mouse model.

22 Fig. S2. Gene expression profiling of CSJ in the OVA-induced AR mouse model.

23 Fig. S3. Heatmap of the gene set enrichment results for CSJ.

24 Fig. S4. GSEA plot of gene expression signatures.

25 Fig. S5. Integrated gene network showing the expression changes in enriched pathways and genes  
26 after CSJ treatment in the OVA-induced AR mouse model.

27 Fig. S6. Identification of key genes and major transcription factors (TFs) related to nasal  
28 inflammation.

29 Fig. S7. Expression profiling of NRF2-associated pathways and NRF2 downstream genes included  
30 in MSigDB.

31 Fig. S8. Effect of CSJ on oxidative stress damage and the NRF2/KEAP1/HO-1 signaling pathway  
32 in the OVA-induced AR mouse model.

33 Fig. S9. HPLC analysis of CSJ.

34 Fig. S10. Three-dimensional molecular docking structure of KEAP1 with five CSJ compounds and  
35 ginnalin A showing the interactions between compounds and the KEAP1 Kelch domain pocket.

36 Fig. S11. Three-dimensional molecular docking structure of MUC5AC and five CSJ compounds  
37 showing the interactions between compounds and MUC5AC.

38

## 39 **2. Supplementary Materials and Methods**

40

## 41 **3. Supplementary Tables (S1–S10)**

42 \* Tables S1–S7. Data are provided as Excel files (Supplementary Tables: S1–S7\_JPA).

43 Table S1. GSEA results for each condition (Excel).

44 Table S2. Integrated network genes for each condition (Excel).

45 Table S3. List of genes in the “O-linked glycosylation of mucins” pathway (Excel).

46 Table S4. List of genes ranked by gene expression changes (Excel).

47 Table S5. List of genes significantly correlated with Muc5ac (Excel).

48 Table S6. Enriched TFs for Muc5ac-associated genes (Excel).

49 Table S7. Results of functional enrichment analysis of Muc5ac-associated genes (Excel).

50 Table S8. Calibration curves, linearity, LOD, and LOQ for the five reference standards ( $n = 3$ ).

51 Table S9. Precision (intra- and inter-day) and recovery of the five reference standards ( $n = 6$ ).

52 Table S10. Contents of the five marker compounds in the *Cirsium japonicum* herb extract.

53

54

55 **1. Supplementary Figures**

56

57

58

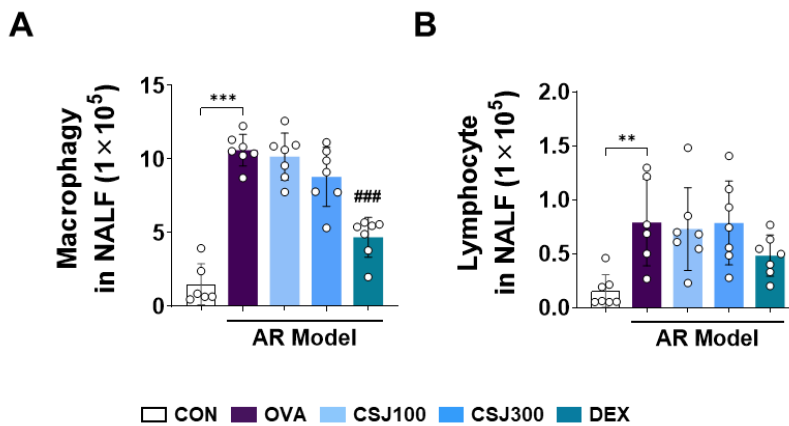

59

60

61 **Fig. S1.** Effects of CSJ on allergy nasal symptoms and nasal lavage fluid (NALF) in the OVA-induced  
62 AR mouse model. Numbers of infiltrated (A) macrophages and (B) lymphocytes in NALF were  
63 calculated. \*\* $P < 0.01$  and \*\*\* $P < 0.001$  compared with the CON group; ### $P < 0.001$  compared with the  
64 OVA group.

65

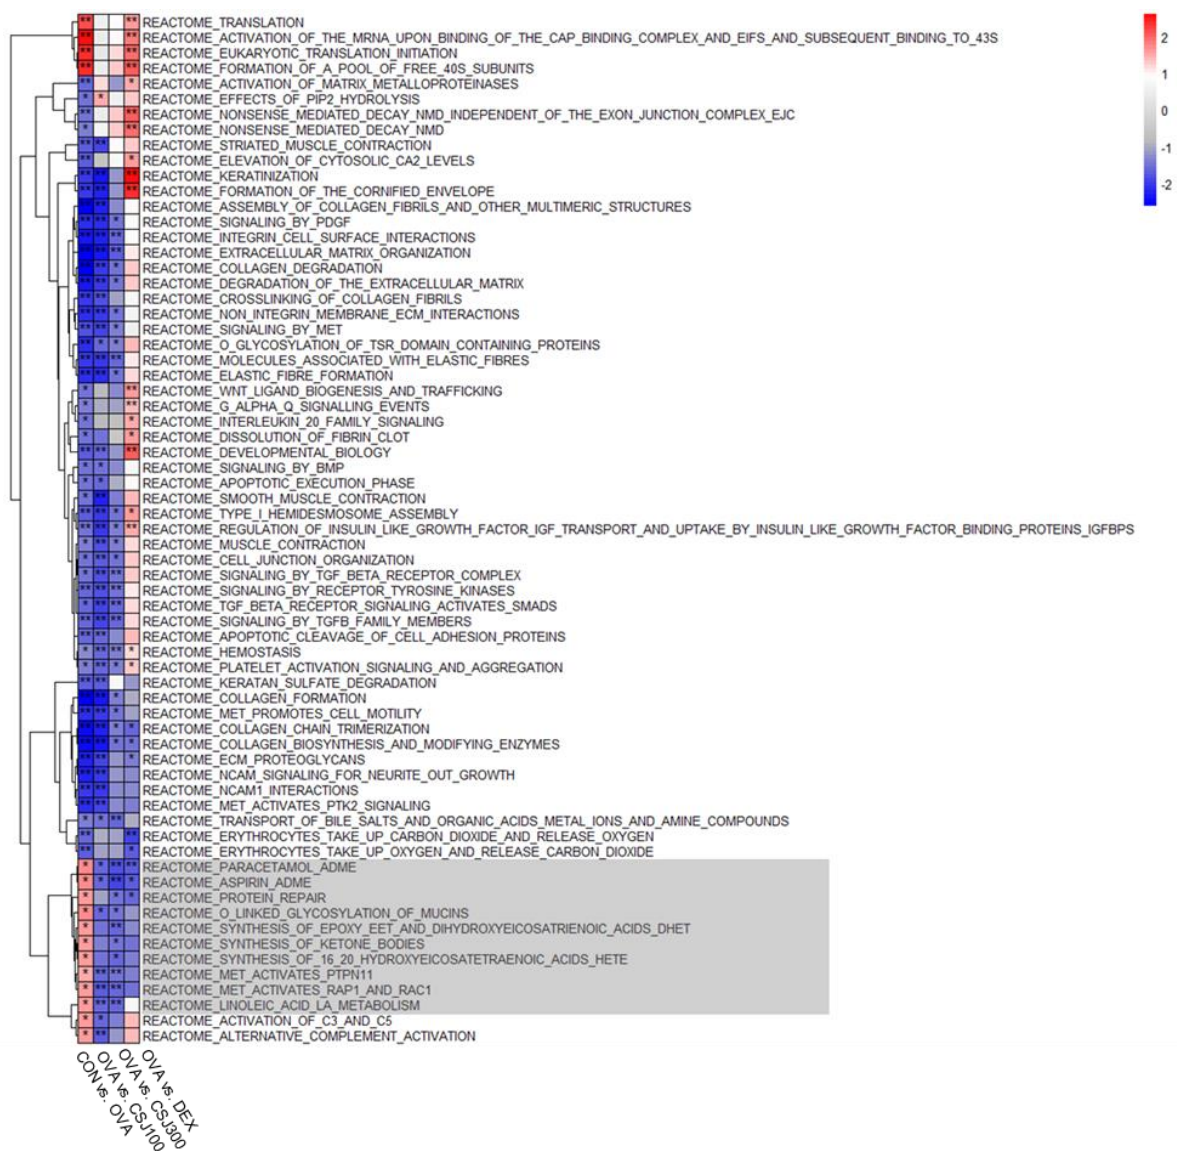

67

68 **Fig. S2.** Gene expression profiling of CSJ in the OVA-induced AR mouse model. Heat map of gene set

69 enrichment analysis (GSEA) results for CSJ treatment using Reactome gene sets. Red/blue colors

70 represent positive/negative normalized enrichment scores. \*  $P < 0.05$ , \*\*  $P < 0.01$ . CSJ: *Cirsium*71 *japonicum*, AR: allergic rhinitis, CON: control, OVA: ovalbumin-induced AR mouse model, CSJ100:

72 OVA-induced AR mouse model treated with CSJ (100 mg/kg/mouse), CSJ300: OVA-induced AR

73 mouse model treated with CSJ (300 mg/kg/mouse), DEX: OVA-induced AR mouse model treated

74 dexamethasone (1 mg/kg/mouse).

75

76



**A**

**Oxidative phosphorylation**

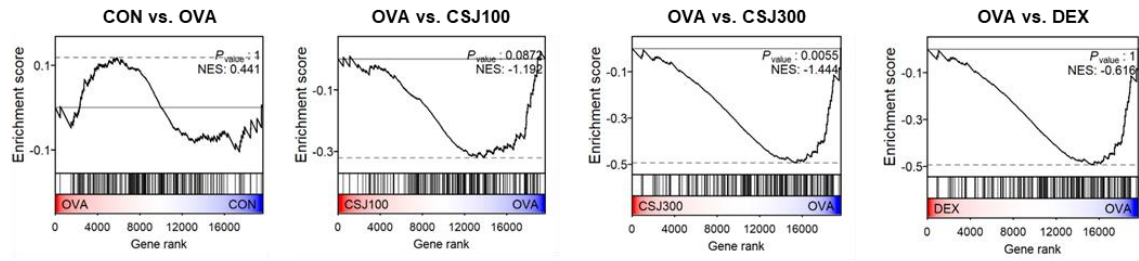

**B**

**Transcriptional activation by NFE2L2 in response to phytochemicals**

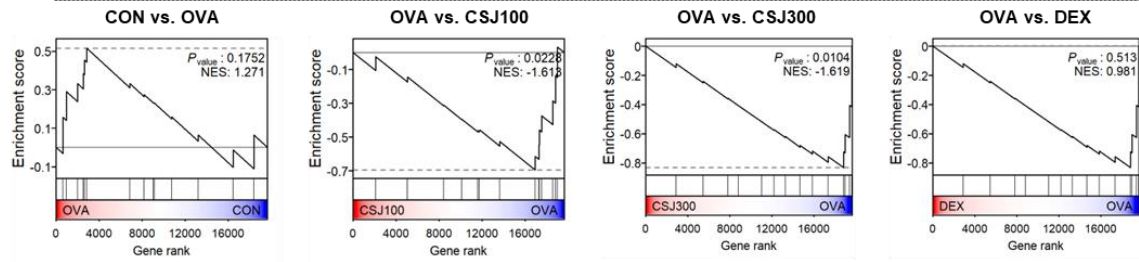

**C**

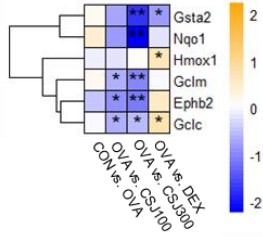

**D**

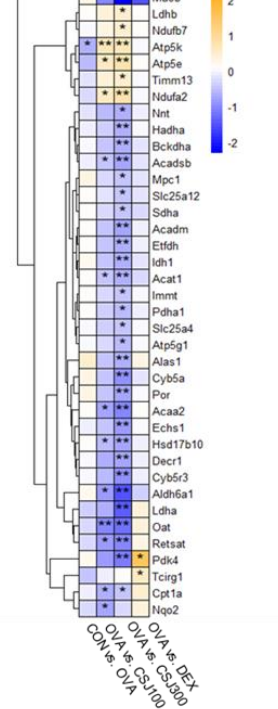

86

87 **Fig. S4.** GSEA plot of gene expression signatures. Plot for “Oxidative phosphorylation” (A) and

88 “Transcriptional activation by Nfe2l2 in response to phytochemicals” (B) under each condition. (C)

89 Heatmap of gene expression related to “Oxidative phosphorylation”. (D) Heatmap of gene expression

90 related to “Transcriptional activation by NFE2L2 (NRF2) in response to phytochemicals”. \*  $P < 0.05$ ,

91 \*\*  $P < 0.01$ .

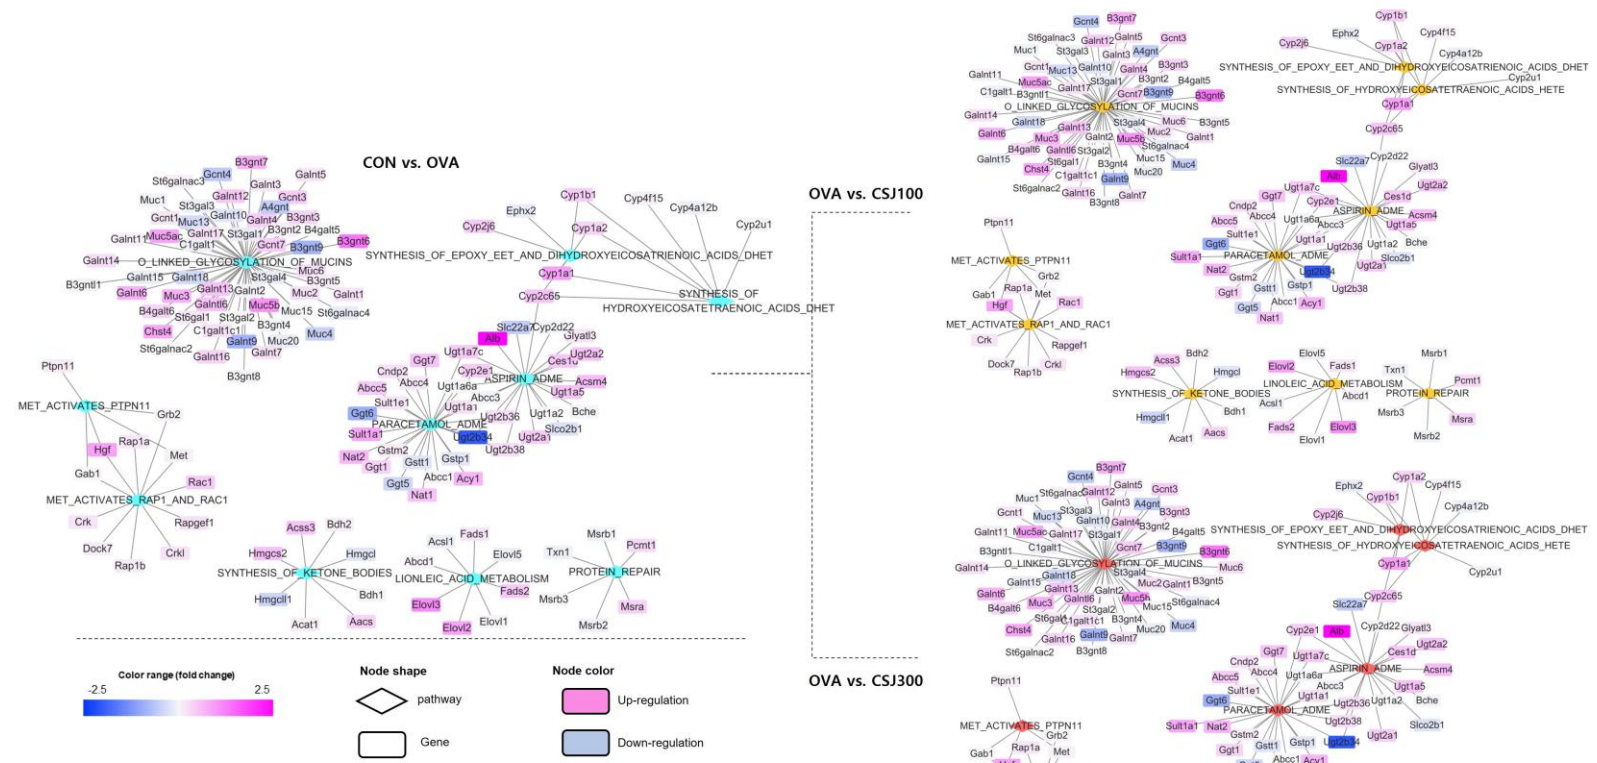

92

93 **Fig. S5.** Integrated gene network showing the expression changes in enriched pathways and genes after CSJ treatment in the OVA-induced AR mouse model.  
 94 Blue and pink squares represent down-regulation and up-regulation of expression, respectively. CSJ: *Cirsium japonicum*, CON: control, OVA: ovalbumin-  
 95 induced AR mouse model, CSJ100: OVA-induced AR mouse model treated with CSJ (100 mg/kg/mouse), CSJ300: OVA-induced AR mouse model treated  
 96 with CSJ (300 mg/kg/mouse).

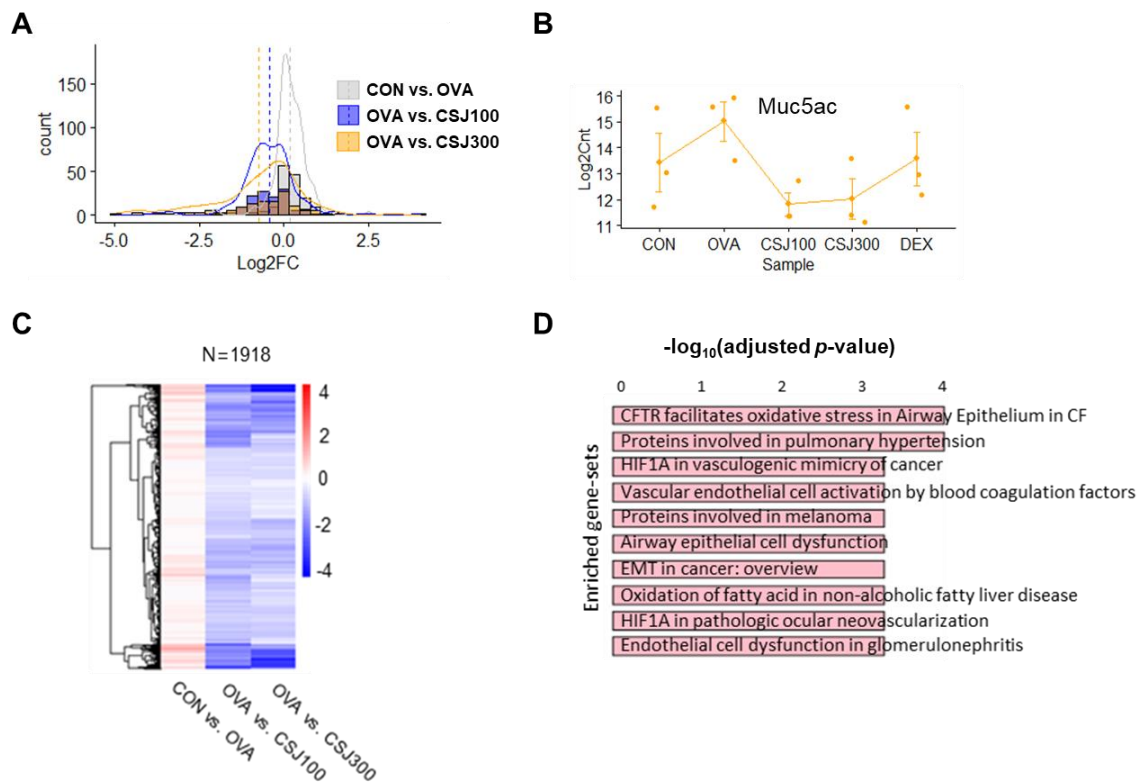

98

99

100 **Fig. S6.** Identification of key genes and major transcription factors (TFs) related to nasal inflammation.

101 (A) DEG distribution under the three conditions. Log2FC indicates the fold change of expression

102 differences for each gene under the three conditions (B) Gene expression abundance for *Muc5ac*. (C)

103 Heatmap for genes significantly correlated with *Muc5ac* expression. (D) Bar plot of enriched functional

104 gene sets significantly correlated with *Muc5ac* expression. CSJ: *Cirsium japonicum*, AR: allergic

105 rhinitis, CON: control, OVA: ovalbumin-induced AR mouse model, CSJ100: OVA-induced AR mouse

106 model treated with CSJ (100 mg/kg/mouse), CSJ300: OVA-induced AR mouse model treated with CSJ

107 (300 mg/kg/mouse).

108

109

110

111

112



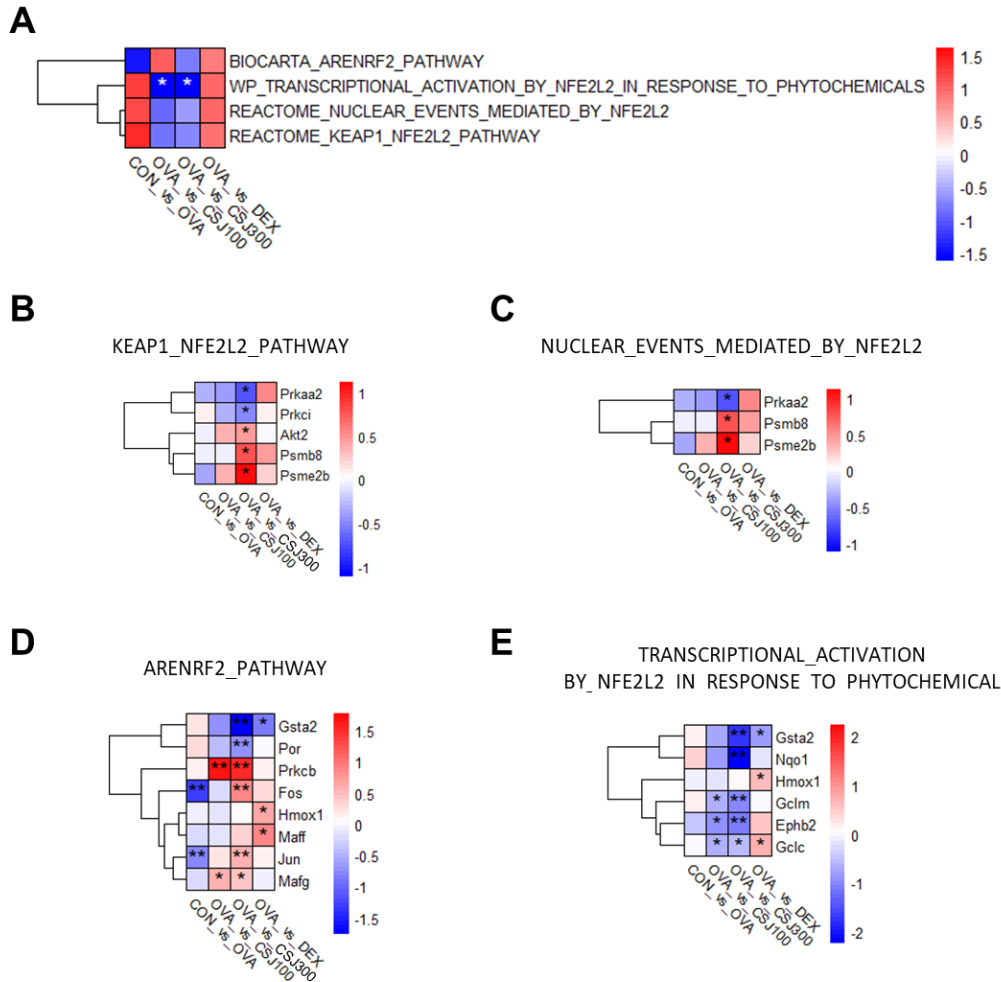

113

114 **Fig. S7.** Expression profiling of NRF2-associated pathways and NRF2 downstream genes included in

115 MSigDB. (A) GSEA results of the NRF2 (NFE2L2)-associated pathway included in MSigDB. Gene

116 expression abundance for downstream genes in Reactome (B and C), Biocarta (D), and WikiPathways

117 (E). \*  $P < 0.05$ , \*\*  $P < 0.01$ .

118

119

120

121

122

123

124

125

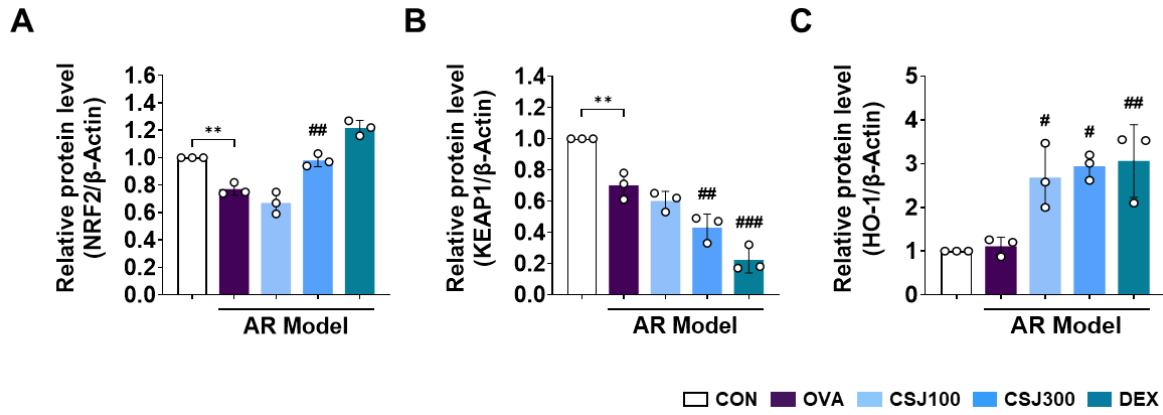

126

127

128 **Fig. S8.** Effect of CSJ on oxidative stress damage and the NRF2/KEAP1/HO-1 signaling pathway in  
 129 the OVA-induced AR mouse model. (A–C) Levels of NRF2, KEAP1, and HO-1 protein in  
 130 homogenized nasal tissues were evaluated using western blotting analysis. Protein levels were  
 131 normalized to the total β-actin level, and relative band intensities in western blots compared with those  
 132 in the CON group were calculated using ImageJ software. Results are presented as the means ± standard  
 133 deviation (SD, n = 3–4). \*\* $P < 0.01$ , significantly different from the CON group, # $P < 0.05$ , ## $P < 0.01$ ,  
 134 and ### $P < 0.001$  significantly different from the group treated with OVA. CSJ: *Cirsium japonicum*, AR:  
 135 allergic rhinitis, CON: control, OVA: ovalbumin-induced AR mouse model, CSJ100: OVA-induced  
 136 AR mouse model treated with CSJ (100 mg/kg/mouse), CSJ300: OVA-induced AR mouse model  
 137 treated with CSJ (300 mg/kg/mouse).

138

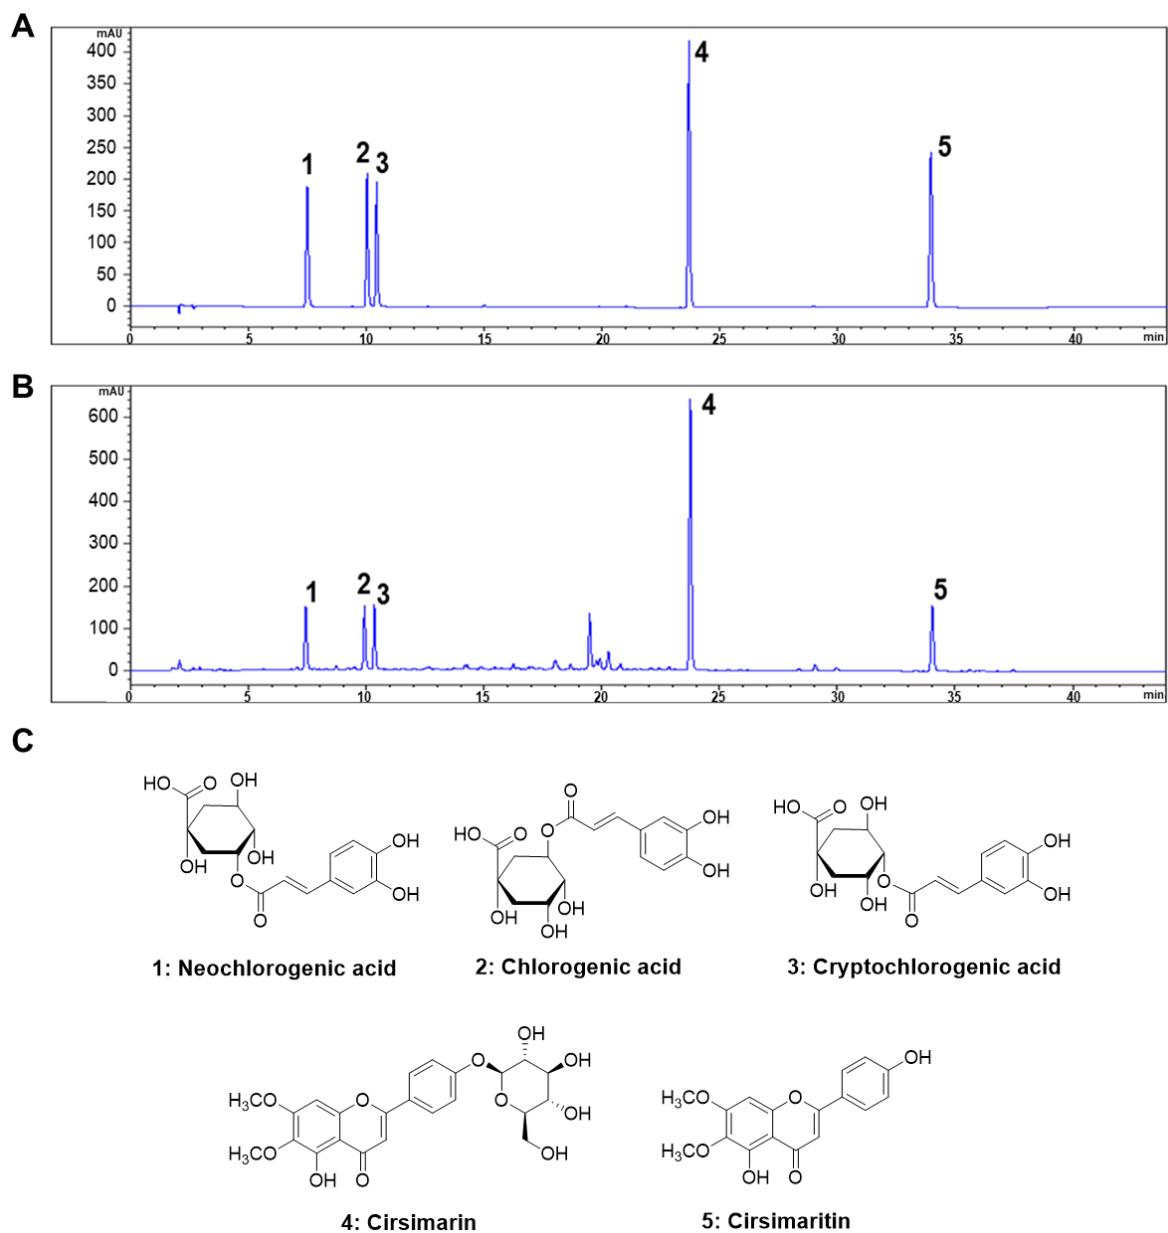

139

140

141 **Fig. S9.** HPLC analysis of CSJ. HPLC chromatograms of five reference standard mixtures (A) and CSJ

142 (B). Chemical structures of five compounds (C). Peak identification: 1, neochlorogenic acid; 2,

143 chlorogenic acid; 3, cryptochlorogenic acid; 4, cirsimarín; 5, cirsimaritin. Chromatographic conditions

144 are described in the text. Detection wavelength was 340 nm.

145

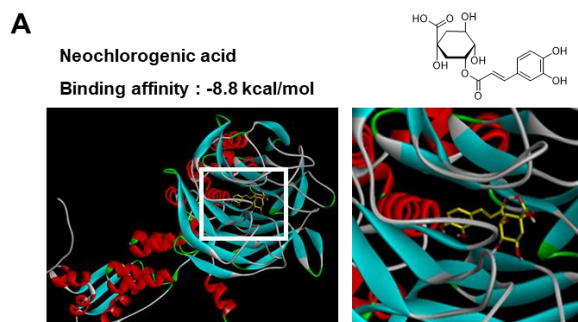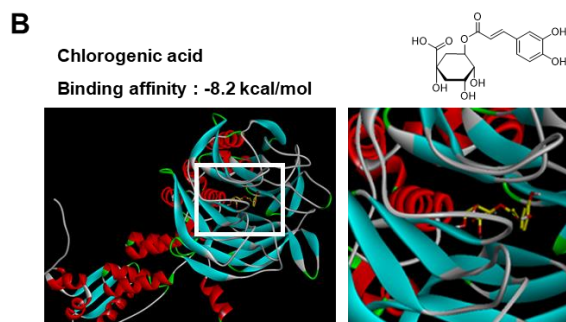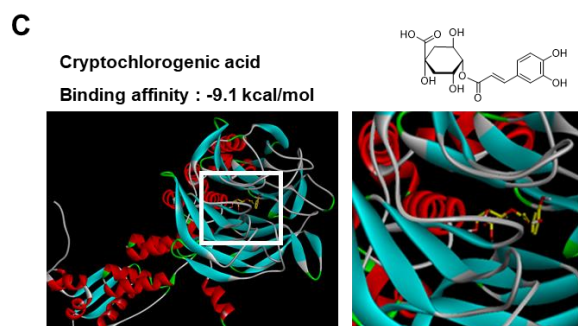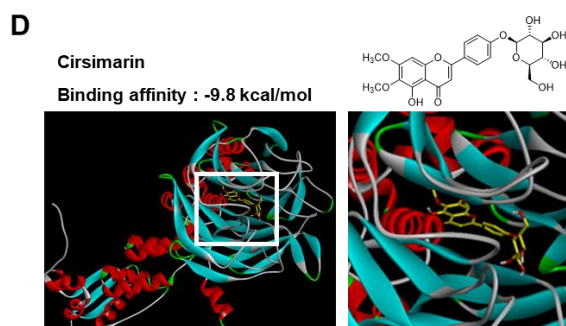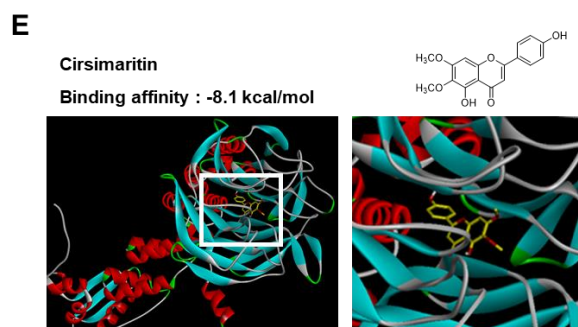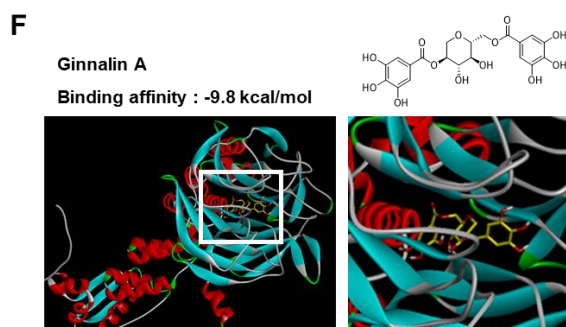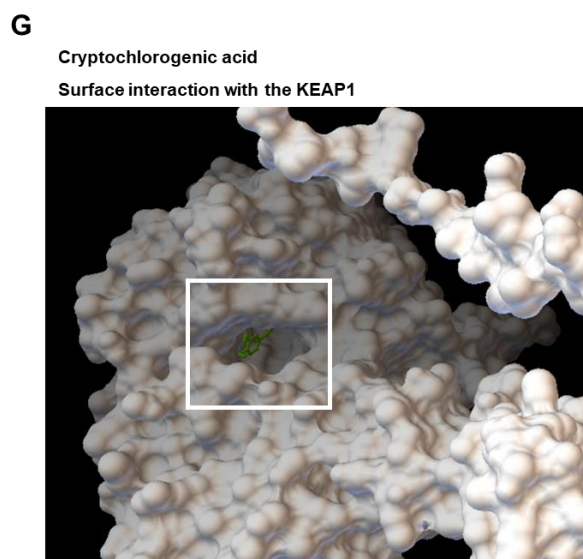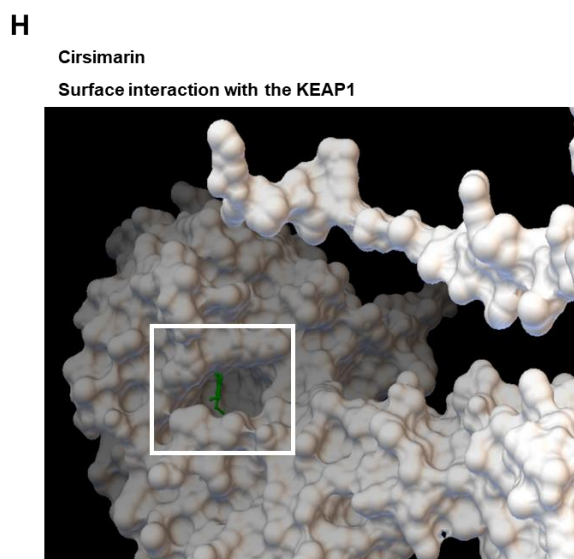

149 **Fig. S10.** Three-dimensional molecular docking structure of KEAP1 with five CSJ compounds and  
150 ginnalin A showing the interactions between compounds and the Kelch domain of KEAP1. The  
151 compounds directly bind to KEAP1 with a binding energy of (A)  $-8.8$  kcal/mol (neochlorogenic acid),  
152 (B)  $-8.2$  kcal/mol (chlorogenic acid), (C)  $-9.1$  kcal/mol. (cryptochlorogenic acid), (D)  $-9.8$  kcal/mol  
153 (cirsimarin), (E)  $-8.1$  kcal/mol (cirsimaritin), and (F)  $-9.8$  kcal/mol (ginnalin A). (G) Surface  
154 interaction representation of cryptochlorogenic acid binding to the Kelch domain of KEAP1. (H)  
155 Surface interaction representation of cirsimarin binding to the Kelch domain of KEAP1. The binding  
156 site of each major CSJ compound docked to the Kelch domain of KEAP1 is indicated by a white square.  
157

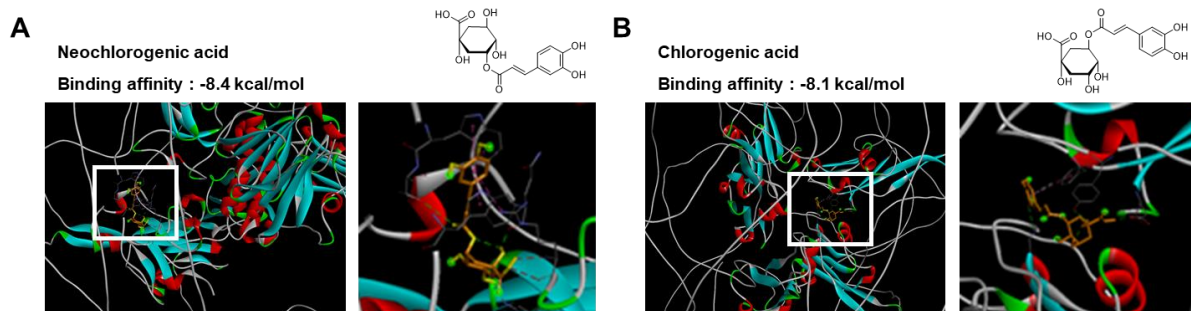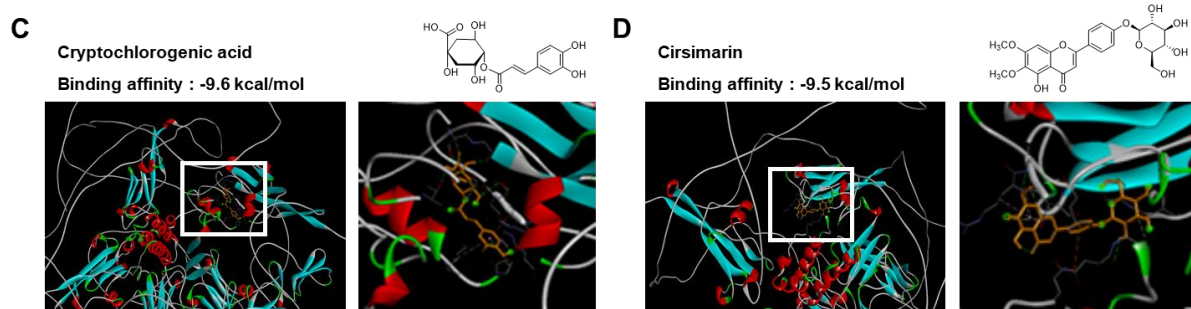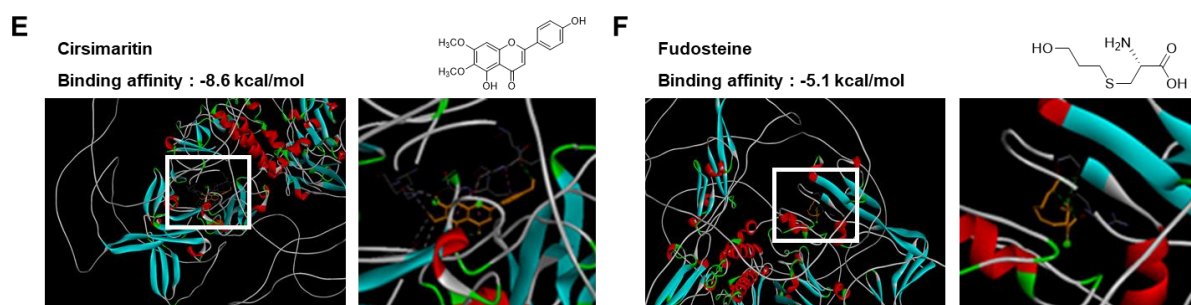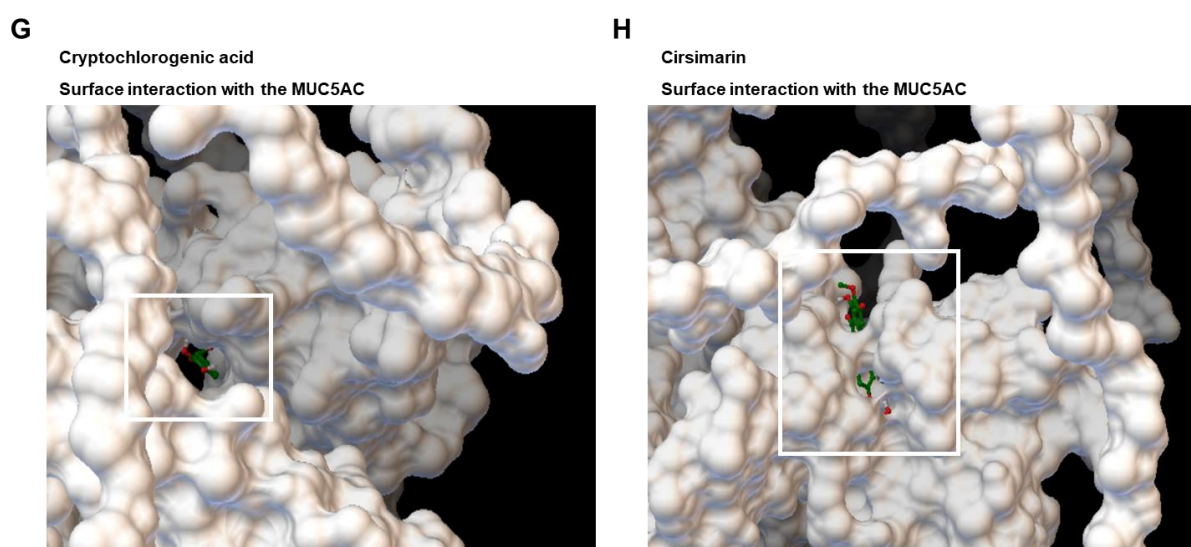

162 **Fig. S11.** Three-dimensional molecular docking structure of MUC5AC and five CSJ compounds  
163 showing the interactions between compounds and the cysteine-rich domain (CysD) of MUC5AC. The  
164 compounds directly bind to MUC5AC with a binding energy of (A)  $-8.4$  kcal/mol (neochlorogenic  
165 acid), (B)  $-8.1$  kcal/mol (chlorogenic acid), (C)  $-9.6$  kcal/mol. (cryptochlorogenic acid), (D)  
166  $-9.5$  kcal/mol (cirsimarin), (E)  $-8.6$  kcal/mol (cirsimaritin), and (F)  $-5.1$  kcal/mol (fudosteine). (G)  
167 Surface interaction representation of cryptochlorogenic acid binding to the CysD of MUC5AC. (H)  
168 Surface interaction representation of cirsimarin binding to the CysD of MUC5AC. The binding site of  
169 each major CSJ compound docked to the CysD of MUC5AC is indicated by a white square.

170

171

## 172 **2. Supplementary Materials and Methods**

173

### 174 *2.1. Preparation of CSJ*

175 CSJ plants were obtained from Omni Herb Co., Ltd. (Kyungpook, Republic of Korea). A voucher  
176 specimen (#JW207) and the herbal components were deposited in the herbarium of the Korea Institute  
177 of Oriental Medicine (Daejeon, Republic of Korea). CSJ (100 g) was extracted with distilled water (1  
178 L) at 100 °C for 3 h using a heat-reflux system (MS-DM609, Misung Scientific, Yangu, Republic of  
179 Korea). The extract solution was filtered and concentrated under reduced pressure using a rotary  
180 evaporator (Ev-1020t, SciLab, Seoul, Republic of Korea) at below 60 °C. The concentrated extract was  
181 then freeze-dried using freeze-drying equipment (LP20; Ilshin Biobase, Dongduchen, Republic of  
182 Korea) at –80 °C for 96 h to obtain 12 g of a CSJ extract powder. An aliquot (20 mg) of the extract  
183 powder was dissolved in 60% methanol (10 mL), and the solution was filtered using a 0.45-µm syringe  
184 filter (Whatman, Clifton, NJ, USA) before high-performance liquid chromatography-grade (HPLC)  
185 analysis.

186

### 187 *2.2. Animals and ethics approval*

188 Six-week-old female BALB/c mice (weight: 18–20 g) were obtained from Samtako Bio (Osan,  
189 Republic of Korea). During the study, the mice were maintained in an animal room at 22 °C ± 2 °C and  
190 55% ± 15% humidity under a 12 h light/dark cycle and provided ad libitum access to food and water.  
191 Animal experiments were performed according to the ARRIVE guidelines and were approved by the  
192 Institutional Animal Care and Use Committee of the Chonnam National University (approval no. CNU  
193 IACUC-YB-2022-83).

194

### 195 *2.3. OVA-induced AR mouse model and treatment regimen*

196 After a week of adaptation, the mice were sensitized by intraperitoneal injection of OVA (50 µg;  
197 Sigma-Aldrich, St. Louis, MO, USA) dissolved in aluminum hydroxide (2 mg; Sigma-Aldrich) on days  
198 0, 7, and 14. Control (non-sensitized) mice were administered saline only. On day 21, the mice were



199 randomly divided into five groups (n = 6–8 mice per group): CON group (control), OVA group (AR  
200 model treated with OVA), CSJ100 group (AR model treated with CSJ100 mg/kg/mice), CSJ300 group  
201 (AR model treated with CSJ300 mg/kg/mice), and DEX group (AR model treated with dexamethasone  
202 1 mg/kg mice). During 7 consecutive days (from day 21 to 27), CSJ or DEX was orally administered to  
203 mice in the treatment groups once daily, whereas mice in the CON and OVA groups were only treated  
204 with saline. On day 21, 23, and 27, the mice were intranasally challenged with 400 µg OVA solubilized  
205 in 20 µL saline. The mice were then sacrificed using alfaxalone (Jurox Pty Ltd., Rutherford, Australia)  
206 28 h and 24 h after the last nasal challenge, and the nasal mucosa and blood were collected for  
207 subsequent experiments.

208

#### 209 *2.4. Evaluation of allergic nasal symptoms*

210 After the final intranasal OVA challenge, allergic nasal symptoms were evaluated in a blinded  
211 manner by counting the frequencies and scores of sneezing and nasal rubbing behaviors, respectively,  
212 in the first 5 min.

213

#### 214 *2.5. Measurement of serum and nasal lavage fluid*

215 Blood samples were centrifuged at  $1,000 \times g$  and  $4\text{ }^{\circ}\text{C}$  for 15 min, and the serum layer was  
216 collected. Serum OVA-specific IgE (500840, Cayman Chemical, Ann Arbor, MI, USA), histamine  
217 (ENZ-KIT140–0001, Enzo Life Science, Farmingdale, NY, USA), and IL-13 (DY413, R&D Systems,  
218 Minneapolis, MN, UK) levels were quantified using appropriate enzyme-linked immunosorbent assay  
219 (ELISA) kits according to the manufacturer's protocols. Nasal lavage fluid (NALF) analysis was  
220 performed by partially resecting the trachea, inserting a catheter into the nasopharynx, and gently  
221 administering 1 mL ice-cold saline. NALF was centrifuged for 10 min at  $2,000 \times g$  and  $4\text{ }^{\circ}\text{C}$ . To  
222 determine the differential immune cell counts in the NALF, the pellet was centrifuged onto the slides  
223 using a cytopsin device (CellSpin Clinical Centrifuge; Hanil Scientific, Incheon, Republic of Korea)  
224 for 10 min at  $1,000 \times g$  and  $4\text{ }^{\circ}\text{C}$ . The slides were stained using the Diff-Quik stain kit (38721, Sysmex  
225 Co., Kobe, Japan) for cell staining according to the corresponding protocol and observed under a light

226 microscope (400× magnification; Olympus Corporation, Tokyo, Japan). The total cell number in NALF  
227 was calculated using a cell counter (Thermo Fisher Scientific, Waltham, MA, USA), and the differential  
228 eosinophil and neutrophil counts in each group were assessed. The separated supernatant was stored at  
229 –80 °C until further analysis.

230

### 231 *2.6. Histopathological and immunohistochemical analysis of nasal mucosa tissues*

232 Mouse nasal tissues of mice were fixed in 10% formalin solution (Sigma-Aldrich) then decalcified  
233 in EDTA buffer (0.1 M; Bio-solution Co. Ltd., Seoul, Republic of Korea), processed using an alcohol-  
234 xylene series, and further embedded in paraffin. Subsequently, the paraffin-embedded nasal tissues  
235 were cut into 5-µm-thick sections and stained with Giemsa staining solution (BBC Biochemical, Mount  
236 Vernon, WA, USA) to analyze the degree of eosinophil infiltration. The thickness of the nasal mucosa  
237 was examined using hematoxylin and eosin (H&E; Sigma-Aldrich) staining, and the degree of mucus  
238 secretion was analyzed for goblet cell hyperplasia using a periodic acid–Schiff (PAS) staining kit  
239 (Sigma-Aldrich). Immunohistochemical staining was performed to assess mucin expression in the nasal  
240 mucosa. Specifically, an anti-MUC5AC antibody (dilution, 1:1,000; NBP2-15196, Novus Biologicals,  
241 Littleton, CO, USA) was diluted in antibody diluent (S0809; Dako, Agilent Technologies, Inc., Santa  
242 Clara, CA, USA) and incubated with nasal tissue sections overnight at 4 °C. After three PBS washes,  
243 tissue slides were incubated with a secondary antibody (MP-7801-15, Vector Labs, Burlingame, CA,  
244 USA) for 30 min at 24 °C, then stained with 3,3'-diaminobenzidine solution (Vector Labs). Stained  
245 tissue slides were scanned and digitalized using a Pannoramic DESK (3DHISTECH, Budapest,  
246 Hungary) digital slide scanner. Histopathological changes were assessed using Pannoramic CaseViewer  
247 software (3DHISTECH). Finally, we quantified the data using ImageJ software (version 1.52).

248

### 249 *2.7. Library preparation and RNA-sequencing*

250 Total RNA (1 µg) was isolated from nasal tissues of OVA-induced AR mice treated with two doses  
251 of CSJ (100 and 300 mg/kg/mice) using the RNeasy Mini Kit (Qiagen, Valencia, CA, USA). RNA  
252 integrity number (RIN) values were determined on a 2100 Bioanalyzer Instrument (Agilent, Santa Clara,

253 CA, USA), and samples with RIN values > 7 were used for sequencing. The sequencing library was  
254 prepared using the MGI Easy RNA Directional Library Prep Kit, and paired -end reads (100bp × 2)  
255 were generated for high-throughput sequencing via MGISEQ-2000 (MGI Tech, Shenzhen, China).

256

#### 257 *2.8. Estimate expression abundance*

258 To obtain pure sequencing reads, adapter sequences and low-quality reads below Q30 were  
259 removed using Cutadapt [1]. Pure and high-quality sequence reads were mapped to the mouse genome  
260 (mm10), and RNA expression abundances were quantified using DESeq2 [2]. Differentially expressed  
261 genes (DEGs) between CSJ and OVA groups were determined by the log-transformed change (LogFC)  
262 and statistical significance ( $p < 0.05$ ) using edgeR [3].

263

#### 264 *2.9. Pathway analysis*

265 Gene set enrichment analysis (GSEA) of pre-ranked expression values was performed according  
266 to the DEG analysis using fgsea (v.1.12.0) in the Bioconductor package [4]. Gene sets (Hallmark,  
267 Reactome, KEGG, and WikiPathways) used in pathway analysis were obtained from the Molecular  
268 Signature Database (MSigDB; <https://www.gsea-msigdb.org/gsea/msigdb>). When identifying the  
269 enriched pathways, 67/41/101 Reactome/Hallmark/WikiPathways were selected according to their  
270 normalized enrichment scores and at least one condition showing a change with  $p < 0.05$ .

271

#### 272 *2.10. Analysis of the NRF2/KEAP1/HO-1 signaling pathway*

273 The expression levels of nuclear factor erythroid 2-related factor 2 (NRF2; CSB-E16188m,  
274 Cusabio, Wuhan, China), Kelch-like ECH-associated protein 1 (KEAP1; CSB-EL012147MO, Cusabio),  
275 and heme oxygenase (HO-1; CSB-E08268m, Cusabio) in NALF were analyzed using an ELISA kits  
276 according to the manufacturer's instructions. Additionally, lipid peroxidation was examined by  
277 measuring the concentration of 4-hydroxynonenal (4-HNE; MBS7606509, MyBioSource, San Diego,  
278 CA, USA), which is expressed in high quantities in NALF during oxidative stress. Data were  
279 normalized to the control data.

280

### 281 *2.11. Western blotting*

282 Protein (20–30 µg) from homogenized nasal tissues was separated on 4–20% Mini-PROTEAN  
283 TGX Precast Protein Gels and transferred onto PVDF (0.2 µm) membranes using the Trans-Blot  
284 transfer system (Bio-Rad, Hercules, CA, USA). The membranes were then blocked with a blocking  
285 solution (Thermo Fisher Scientific) at 24 °C for 1 h to inhibit non-specific binding and probed with  
286 primary antibodies against NRF2 (ab137550; Abcam, Cambridge, UK; dilution, 1:1,000), KEAP1  
287 (8047; Cell Signaling Technology, Danvers, MA, USA; dilution, 1:1,000), HO-1 (70081; Cell Signaling  
288 Technology; dilution, 1:1,000), and β-actin (4970; Cell Signaling Technology; dilution, 1:1,000)  
289 overnight at 4 °C. After membranes were washed with a TBS-T, they were incubated at 24 °C for 1 h  
290 with the relevant secondary antibodies conjugated with horseradish peroxidase (Santa Cruz  
291 Biotechnology, Dallas, TX, USA), and the immunoreactivity was detected using an enhanced  
292 chemiluminescence reagent (EzWestLumiOne, Atto Corporation, Tokyo, Japan). Protein bands were  
293 visualized using the ChemiDoc Imaging System (Bio-Rad) and quantified using ImageJ software  
294 (version 1.52a).

295

### 296 *2.12. Chemicals and reagents for standard solution preparation*

297 Reference standards for neochlorogenic acid (PubChem CID: 5280633, CFN97472), chlorogenic  
298 acid (PubChem CID: 1794427, CFN99116), cryptochlorogenic acid (PubChem CID: 9798666,  
299 CFN99117), cirsimarin (PubChem CID: 159460, CFN96507), and cirsimaritin (CID: 188323,  
300 CFN97126) were purchased from ChemFaces (Wuhan, China). The purity of all reference standards  
301 was >98%. Acetonitrile, methanol, and water were of HPLC grade and purchased from J. T. Baker  
302 (Phillipsburg, NJ, USA). Analytical-grade formic acid was purchased from Merck (Darmstadt,  
303 Germany). Standard stock solutions of five reference standards (all at 2 mg/mL) were prepared in  
304 HPLC-grade methanol, stored at <4 °C, and used for HPLC analysis after serial dilution in methanol.

305

### 306 *2.13. Instrumentation and optimum chromatographic conditions*

307 HPLC analyses were conducted on an Agilent 1200 HPLC instrument (Agilent Technologies)  
308 equipped with a vacuum degasser, binary pump, column compartment, autosampler, and diode array  
309 detector (DAD). Agilent ChemStation software was used for data collection and analysis. HPLC  
310 conditions were optimized for the column, mobile phase, flow rate, and detection wavelength to identify  
311 the bioactive compounds in CSJ. Specifically, a Zorbax Eclipse Plus C18 column (150 × 4.6 mm, 3 μm;  
312 Agilent Technologies) was used for chromatographic separation, and the column temperature was  
313 maintained at 35 °C. The mobile phase consisted of 0.1% formic acid in water (A) and acetonitrile (B),  
314 with gradient elution. The gradient solvent system was as follows: 95–60% A (0–30 min), 60–30% A  
315 (30–40 min), and 30–0% A (40–45 min). The column was re-equilibrated with 95% A for 10 min prior  
316 to each analysis and the flow rate was set at 0.8 mL/min. A wavelength of 340 nm yielded the highest  
317 S/N ratio for the five reference standards; therefore, detection was conducted at 340 nm. The injection  
318 volume of each sample was 5 μL. Using the optimized chromatographic conditions, the five reference  
319 standards were successfully separated and eluted within 45 min (Fig. S9A). The presence of the five  
320 markers in CSJ was confirmed by comparing their UV spectra and retention times with those of the  
321 corresponding reference standards (Fig. S9B). The chemical structures of the five reference standards  
322 (neochlorogenic acid, chlorogenic acid, cryptochlorogenic acid, cirsimarin, and cirsimaritin) are shown  
323 in Fig. S9C.

324

#### 325 *2.14. Validation of the HPLC method and sample analysis results*

326 The HPLC method and analysis results were validated by determining the linearity, limit of  
327 detection (LOD), limit of quantification (LOQ), precision, and accuracy. Linearity was assessed from  
328 calibration curves generated from three replicate injections of standard solutions at five levels. The  
329 LOD and LOQ of each standard solution were determined using signal-to-noise (S/N) ratios of 3 and  
330 10, respectively. The recovery test was performed to determine the accuracy of the method. The  
331 regression equations, linear ranges, correlation coefficients, LOD, and LOQ values of the reference  
332 standards are listed in Table S8. All calibration curves showed good linearity ( $r^2 \geq 0.999$ ) within the  
333 tested concentration ranges. The relative standard deviation (RSD) values of the intra- and inter-day

334 precisions for the five reference standards were in the ranges 0.09–0.76% and 0.15–1.23%, respectively  
335 (Table S9). The recovery test was performed by adding three known concentrations (80%, 100%, and  
336 120%) of the five reference standards into the CSJ extract. As shown in Table S9, the recovery rate of  
337 each reference standard was in the range 99.24–100.88%, and the RSD values were less than 4%. These  
338 data indicated that the developed HPLC/DAD method is reliable and highly accurate. The developed  
339 analytical method was applied for simultaneous quantitative analysis of the five marker compounds in  
340 the CSJ extract. The samples were analyzed in triplicate, and the results are summarized in Table S10.  
341 The contents of the five markers in the CSJ extract were in the range of 1.64–7.93 mg/g; the most  
342 abundant component in the extract was cirsimarin ( $7.93 \pm 0.04$  mg/g) followed by cirsimaritin ( $3.54 \pm$   
343  $0.04$  mg/g).

344

#### 345 *2.15. Collection of major CSJ compounds and KEAP1 protein structures for docking analysis*

346 Structural information was collected for ginnalin A, a positive control known to bind to KEAP1  
347 [5], and five compounds derived from CSJ (neochlorogenic acid, chlorogenic acid, cryptochlorogenic  
348 acid, cirsimarin, and cirsimaritin). 3D sdf files were downloaded from the PubChem database and used  
349 to obtain structural information of the compounds [6]. Compound structure files were converted into  
350 pdbqt files using OpenBabel software [7]. KEAP1 protein structural information was obtained using  
351 human-derived data provided by the AlphaFold 2.0 (AF) database [8]. As AF predicts the structure of  
352 a protein using artificial intelligence and provides the prediction result, it has the advantage of  
353 confirming all sequence structures of a protein. The KEAP1 (AF entry: Q14145) structure in pdb format  
354 was downloaded from AF and converted to pdbqt format using OpenBabel software.

355

#### 356 *2.16. Molecular docking of major CSJ compounds with KEAP1 and statistical processing*

357 Molecular docking analysis was performed between the six compounds collected from PubChem  
358 and the KEAP1 protein collected from AF. Docking analysis was performed using AutoDock vina  
359 software [9]. The exhaustiveness of the docking analysis parameters was set to 100, the center  
360 coordinates were set to (0, 0, 0), and the grid box size was set to (126, 126, 126). In each docking

361 analysis, the interaction with the lowest binding score was selected based on the interaction between  
362 the compound and KEAP1. Additionally, docking analysis using AF tends to generate better binding  
363 scores than that using the more common Protein Data Bank database [10] because it excludes specific  
364 compounds, such as water molecules present around the protein, and uses only the protein sequence  
365 [11]. To eliminate this bias, a significant binding-affinity score was derived by calculating the  $p$ -value  
366 using a permutation test [12]. The 108,625 pairs of docking affinity scores obtained using the same  
367 software and parameters as a previous study [11] were used as permutation sets. For the docking score  
368 belonging to the permutation set, the value corresponding to the top 10% was selected as the threshold  
369 ( $p < 0.1$ ). Compounds with binding-affinity scores below this threshold were selected as significant  
370 compounds for the docking assays.

371

#### 372 *2.17. Collection of major CSJ compounds and MUC5AC protein structures for docking analysis*

373 Structural information was collected for fudosteine, a positive control known to interact with the  
374 MUC5AC protein [13], and the five CSJ compounds. 3D sdf files were downloaded from the PubChem  
375 database and used to obtain structural information on the compounds. The compound structure files  
376 were converted into pdbqt files using OpenBabel software. The MUC5AC protein structure was based  
377 on the human protein structure provided in the AF database. AF provides data by cutting proteins with  
378 more than 2,700 amino acids every 1,400 amino acids, with a difference of 200 for the analysis of  
379 overlapping parts. For example, first-fragment data are given in the form of sequence numbers 1–1,400,  
380 and second-fragment data are given in the form of sequence data numbers 200–1,600. Therefore, as  
381 MUC5AC contains 5,654 amino acids, it was provided in 23 fragments (AF entry: P98088). After all  
382 23 fragment structures were downloaded, they were preprocessed in pdbqt form using OpenBabel  
383 software for subsequent analysis.

384

#### 385 *2.18. Molecular docking of CSJ compounds with MUC5AC and statistical processing*

386 Molecular docking was performed in the same manner as that for KEAP1 protein docking analysis  
387 (Section 2.16). The analysis generated 23 docking results for each compound, and the interaction with

388 the lowest binding score was selected as the interaction between the compound and MUC5AC. The  
389 statistical processing method was also the same as that for KEAP1, and a value of  $p < 0.1$  was selected  
390 as the threshold value using the data set obtained in a previous study [11].

391

#### 392 *2.19. Statistical analysis*

393 All statistical analyses were performed using Prism version 9 (GraphPad Software, Inc., La Jolla,  
394 CA, USA). Data are expressed as means  $\pm$  standard deviation (SD). Data between groups were analyzed  
395 using one-way analysis of variance (ANOVA) followed by Tukey's multiple comparison test. Statistical  
396 significance was set to  $p < 0.05$ .

397

398



399 **3. Supplementary Tables**

400

401 Table S8. Calibration curves, linearity, LOD, and LOQ for the five reference standards ( $n = 3$ )

| Compound               | Regression equation <sup>a</sup> | Linear range<br>( $\mu\text{g/mL}$ ) | Correlation<br>coefficient ( $r^2$ ) | LOD <sup>b</sup><br>( $\mu\text{g/mL}$ ) | LOQ <sup>c</sup><br>( $\mu\text{g/mL}$ ) |
|------------------------|----------------------------------|--------------------------------------|--------------------------------------|------------------------------------------|------------------------------------------|
| Neochlorogenic acid    | $y = 15.598x + 17.597$           | 20–100                               | 0.9996                               | 0.05                                     | 0.15                                     |
| Chlorogenic acid       | $y = 17.011x + 19.165$           | 20–100                               | 0.9993                               | 0.02                                     | 0.07                                     |
| Cryptochlorogenic acid | $y = 15.879x + 15.690$           | 20–100                               | 0.9991                               | 0.02                                     | 0.07                                     |
| Cirsimarín             | $y = 13.934x + 65.830$           | 60–300                               | 0.9990                               | 0.12                                     | 0.38                                     |
| Cirsimaritin           | $y = 8.808x + 11.190$            | 20–100                               | 0.9990                               | 0.03                                     | 0.09                                     |

402 <sup>a</sup>y, Peak area of the compound; x, concentration ( $\mu\text{g/mL}$ ) of the compound

403 <sup>b</sup>S/N = 3

404 <sup>c</sup>S/N = 10

405 Abbreviations: LOD, limit of detection; LOQ, limit of quantification

406

407

408 Table S9. Precision (intra- and inter-day) and recovery of the five reference standards ( $n = 6$ )

| Compound               | Intra-day precision | Inter-day precision | Recovery     |         |
|------------------------|---------------------|---------------------|--------------|---------|
|                        | RSD (%)             | RSD (%)             | Recovery (%) | RSD (%) |
| Neochlorogenic acid    | 0.71                | 1.21                | 99.24        | 3.04    |
| Chlorogenic acid       | 0.72                | 1.23                | 99.83        | 1.64    |
| Cryptochlorogenic acid | 0.76                | 1.18                | 100.88       | 1.72    |
| Cirsimarín             | 0.24                | 0.34                | 100.82       | 1.64    |
| Cirsimaritin           | 0.09                | 0.15                | 99.63        | 2.79    |

409 Abbreviation: RSD, relative standard deviation

410

411

412 Table S10. Contents of the five marker compounds in the *Cirsium japonicum* herb extract

| Compound               | Content ( <i>n</i> = 3) |      |
|------------------------|-------------------------|------|
|                        | mg/g (mean ± SD)        | %    |
| Neochlorogenic acid    | 1.92 ± 0.01             | 0.19 |
| Chlorogenic acid       | 1.64 ± 0.02             | 0.16 |
| Cryptochlorogenic acid | 1.73 ± 0.02             | 0.17 |
| Cirsimarín             | 7.93 ± 0.04             | 0.79 |
| Cirsimaritin           | 3.54 ± 0.04             | 0.35 |

413 Abbreviation: SD, standard deviation

414

415

416 **References**

- 417 [1] M. Martin, Cutadapt removes adapter sequences from high-throughput sequencing reads,  
418 EMBnet.journal 17 (2011) 1.
- 419 [2] M.I. Love, W. Huber, S. Anders, Moderated estimation of fold change and dispersion for RNA-seq  
420 data with DESeq2, Genome Biol. 15 (2014) 550.
- 421 [3] M.D. Robinson, D.J. McCarthy, G.K. Smyth, edgeR: a Bioconductor package for differential  
422 expression analysis of digital gene expression data, Bioinformatics 26 (2010) 139–140.
- 423 [4] S.V. Korotkevich G, Sergushichev A, Fast gene set enrichment analysis, bioRxiv (2019).  
424 <https://doi.org/doi:10.1101/060012>
- 425 [5] Z. Zhang, L. Peng, Y. Fu, et al., Ginnalin A binds to the subpockets of Keap1 Kelch domain to  
426 activate the Nrf2-regulated antioxidant defense system in SH-SY5Y cells, ACS Chem. Neurosci. 12  
427 (2021) 872–882.
- 428 [6] S. Kim, J. Chen, T. Cheng, et al., PubChem 2019 update: improved access to chemical data, Nucleic  
429 Acids Res. 47 (2019) D1102–D1109.
- 430 [7] N.M. O’Boyle, M. Banck, C.A. James, et al., Open Babel: An open chemical toolbox, J.  
431 Cheminform. 3 (2011) 33.
- 432 [8] J. Jumper, R. Evans, A. Pritzel, et al., Highly accurate protein structure prediction with AlphaFold,  
433 Nature 596 (2021) 583–589.
- 434 [9] O. Trott, A.J. Olson, AutoDock Vina: improving the speed and accuracy of docking with a new  
435 scoring function, efficient optimization, and multithreading, J. Comput. Chem. 31 (2010) 455–461.
- 436 [10] H.M. Berman, J. Westbrook, Z. Feng, et al., The Protein Data Bank, Nucleic Acids Res. 28 (2000)  
437 235–242.
- 438 [11] M. Park, S.-Y. Lee, H. Lee, J.-M. Yi, Effect of terpenes from *Poria cocos*: Verifying modes of  
439 action against Alzheimer’s disease using molecular docking, drug-induced transcriptomes and diffusion  
440 network, biorxiv (2023). <https://doi.org/10.1101/2023.06.01.543358>
- 441 [12] F. Pesarin, L. Salmaso, The permutation testing approach a review, Statistica 70 (2010) 481–509.

442 [13] C.K. Rhee, C.M. Kang, M.B. You, et al., Effect of fudosteine on mucin production, *Eur. Respir. J.*  
443 32 (2008) 1195–1202.  
444
